# Supplementary material for: Competing adiabatic and nonadiabatic pathways in the cis–trans photoisomerization of cis-1,2-di(1-methyl-2-naphthyl)ethene. A zwitterionic twisted intermediate
Source: Royal Society of Chemistry journal article supplement (doi:10.1039/c3pp50173f), 2013-08-09
Supplement: c3pp50173f.pdf [file c3pp50173f.pdf]

## Electronic Supplementary Information

### Competing adiabatic and nonadiabatic pathways in the cis-trans photoisomerization of *cis*-1,2-di(1-methyl-2-naphthyl)ethene

Jack Saltiel,<sup>\*a</sup> V. K. Ratheesh Kumar,<sup>a</sup> Christorher E. Redwood,<sup>a</sup> Frank B. Mallory<sup>b</sup> and Clelia W. Mallory<sup>b,c</sup>

<sup>a</sup>Department of Chemistry and Biochemistry, Florida State University, Tallahassee, FL 32306-4390 USA; <sup>b</sup>Bryn Mawr College, Bryn Mawr, PA 19010, USA; <sup>c</sup>University of Pennsylvania, Philadelphia, PA 19104, USA.

[saltiel@chem.fsu.edu](mailto:saltiel@chem.fsu.edu)

**Electronic Supplementary Information Available:** Figures giving the  $T$  dependence of MCH density (Fig. 1S, Table 1S), the typical fluorescence intensity dependence of emission from *c*-D-1-MNE solutions on excitation intensity (Fig. 2S), typical fluorescence decay profiles following pulsed excitation (Fig. 3S) and the dependence of the *t*-D-1-MNE fluorescence spectrum on excitation wavelength (Fig. 4S).

**Table 1S:** MCH Density Dependence on  $T^a$

| $t, ^\circ\text{C}$ | $d^a$    | $t, ^\circ\text{C}$ | $d^a$    |
|---------------------|----------|---------------------|----------|
| -95.1               | 0.86893  | 25                  | 0.764697 |
| -63.5               | 0.84144  | 29.95               | 0.76046  |
| -45.2               | 0.82561  | 45.2                | 0.74702  |
| -22.9               | 0.80638  | 60.7                | 0.7336   |
| 0                   | 0.78658  | 79.75               | 0.7166   |
| 15                  | 0.773465 | 99.5                | 0.69825  |

<sup>a</sup> Egloff, G. *Physical Properties of Hydrocarbons*, Reinhold: New York, 1939 Vol. 1.

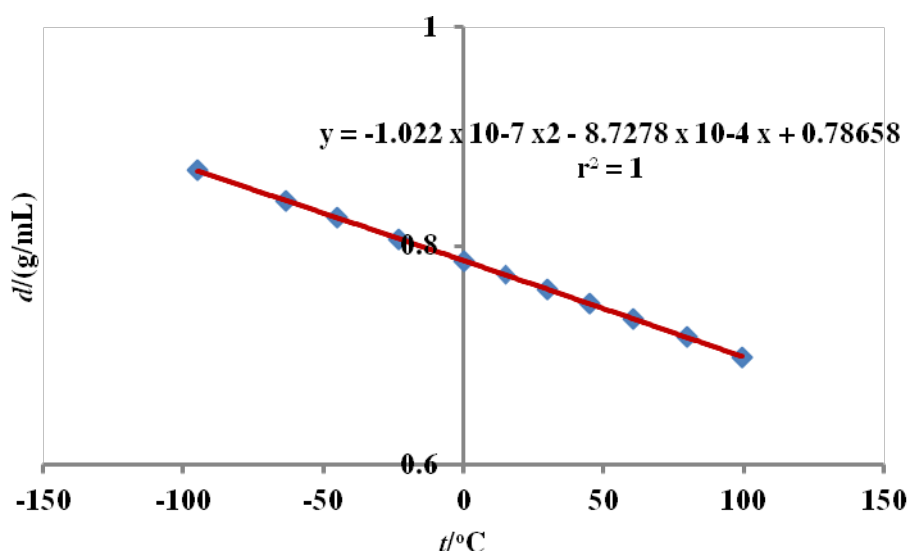

**Figure 1S.** Quadratic fit of MCH density dependence on  $T$  (data from Table 2S).

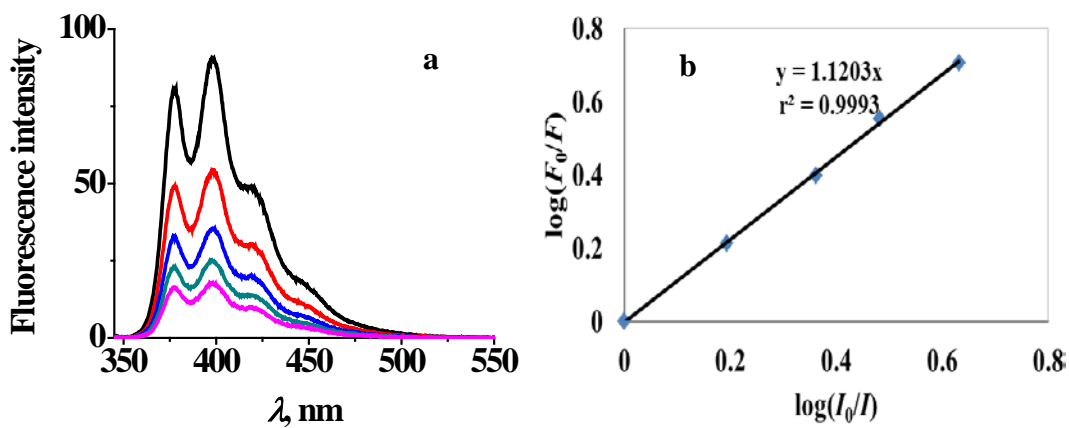

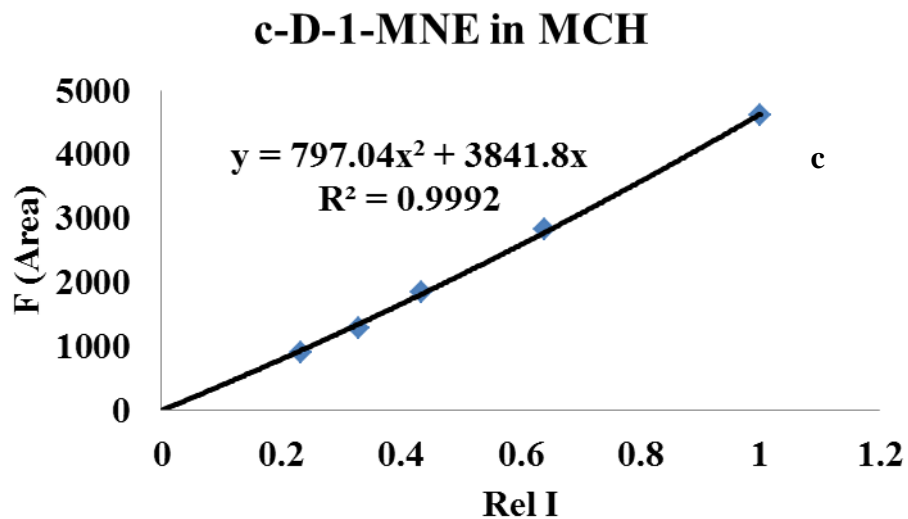

**Fig. 2S.** a) Typical results of fluorescence spectra from a *c*-D-1-MNE solution in MCH as a function of neutral density filter absorbance. b) The log-log plot of relative fluorescence area to relative incident light intensity (25.0 °C,  $\lambda_{\text{exc}} = 313$  nm, 1.00 cm cell). c) Quadratic plot of fluorescence area vs. relative excitation intensity.

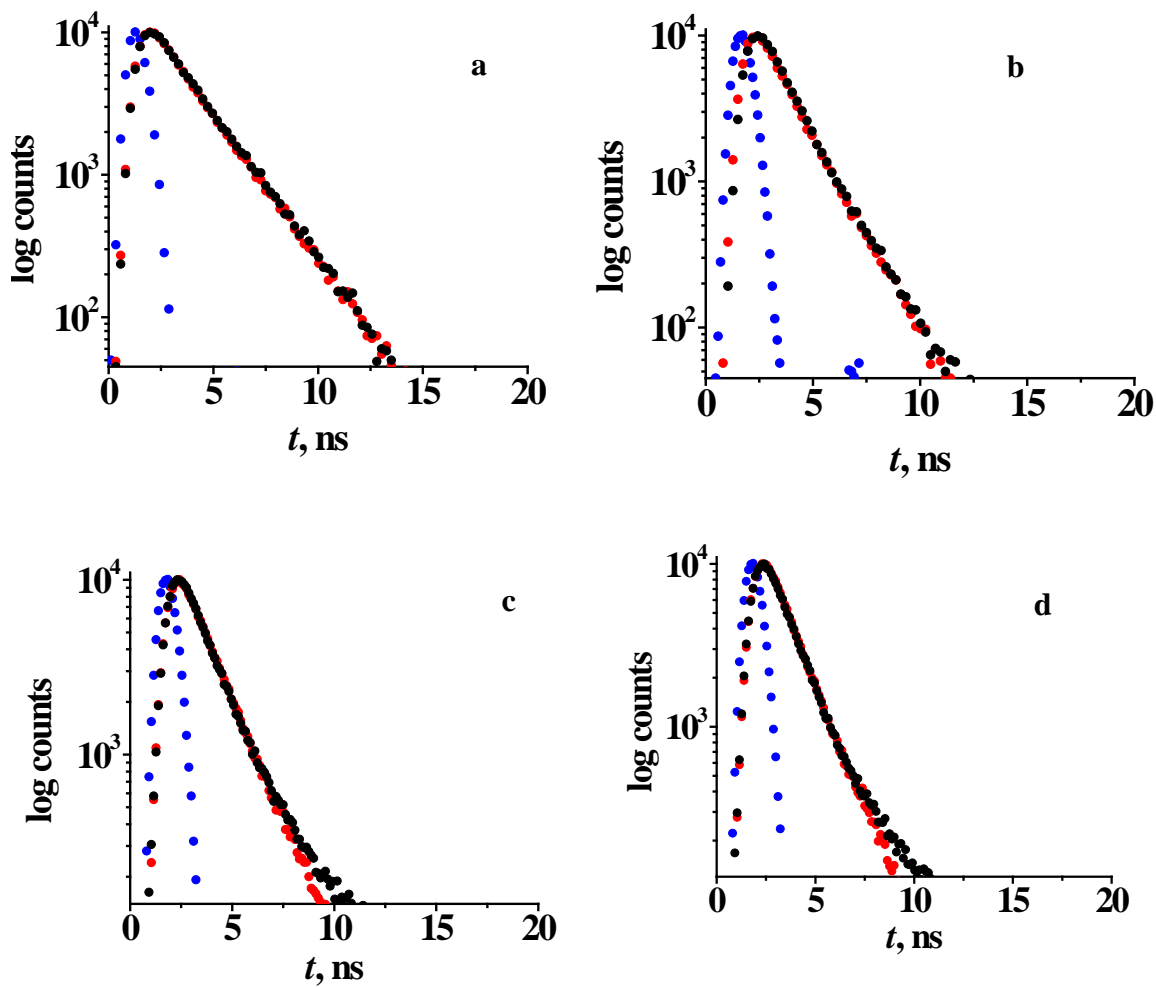

**Fig. 3S.** Emission decay profiles of *c*- (black) and *t*-D-1-MNE (red) in argon saturated MCH (a), TOL (b), AN (c) and DMSO (d) ( $T = 23.4$  °C,  $\lambda_{\text{exc}} = 295$  nm,  $\lambda_{\text{mon}} = 400$  nm, prompt is shown in blue).

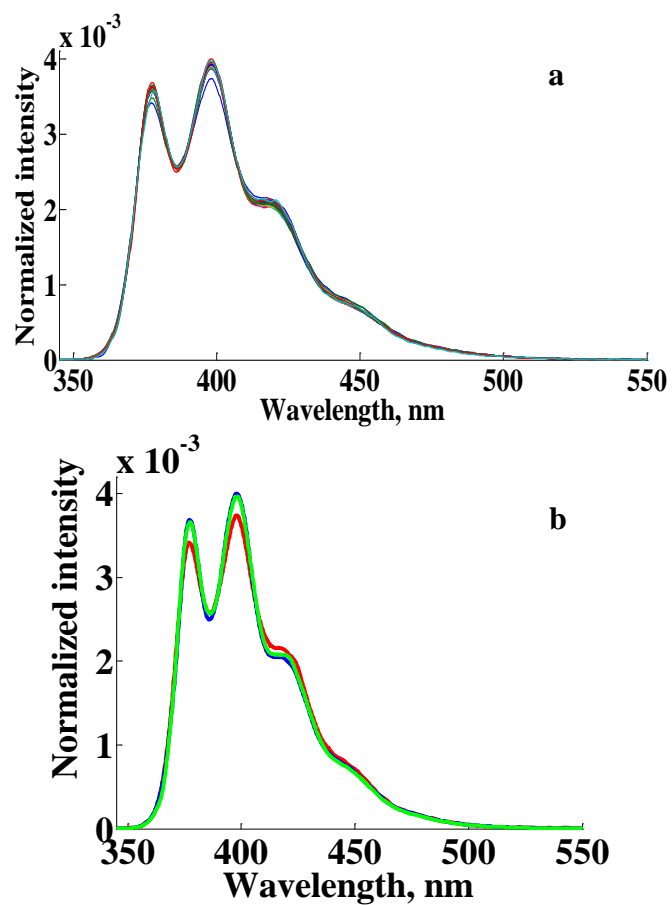

**Fig. 4S.** a) Normalized (with respect to area) emission spectra of *t*-D-1-MNE in MCH at different excitation wavelengths ( $\lambda_{\text{exc}} = 260 - 375$  @ 5 nm interval, 25.0 °C, 1.0 cm standard quartz cell); b) Spectra for  $\lambda_{\text{exc}} = 260$  nm (red), 270 nm (blue) and 365 nm (green), illustrating the maximum observed variation.
